# Supplementary material
Source: publisher figshare collection journal article supplement (https://tandf.figshare.com/articles/dataset/_/21256452)
Supplement: Supplementary file 1 [file 1]

Archive with 6 entries (6 files):
- icmt_a_2026915_sm1078.pdf
- icmt_a_2026915_sm1077.pdf
- icmt_a_2026915_sm1075.pdf
- icmt_a_2026915_sm1074.pdf
- icmt_a_2026915_sm1073.doc
- icmt_a_2026915_sm1070.doc
