# Supplementary material
Source: publisher figshare collection journal article supplement (https://tandf.figshare.com/articles/dataset/_/21256452)

**A**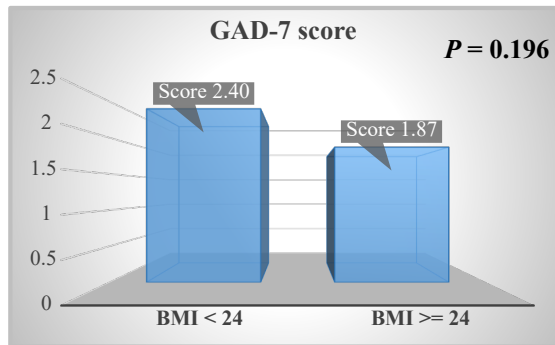**B**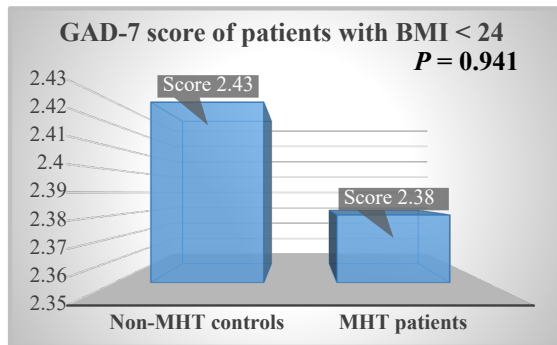**C**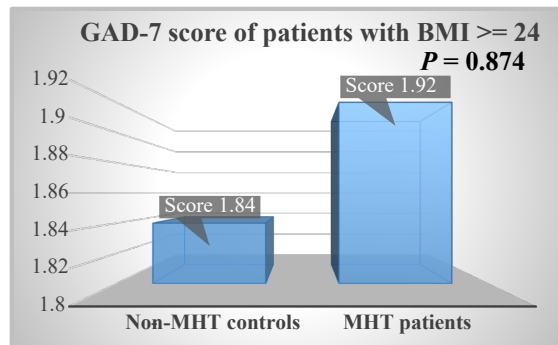

Supplement: Supplementary file 1 [file 1 › icmt_a_2026915_sm1078.pdf]

**A**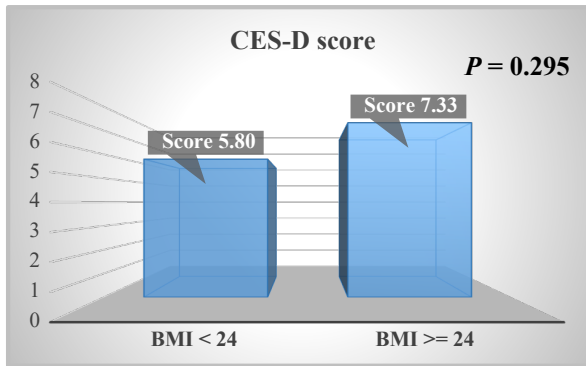**B**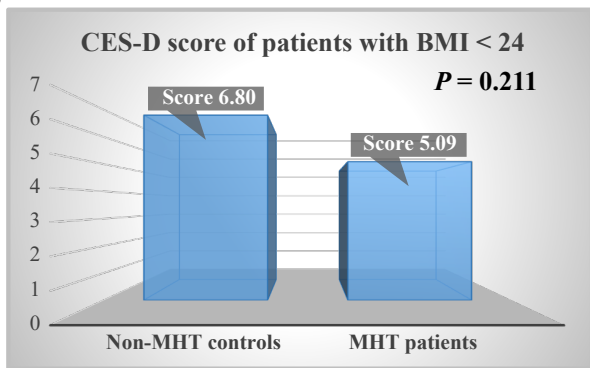**C**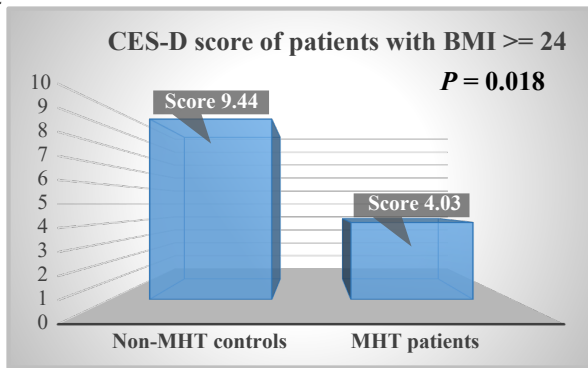

Supplement: Supplementary file 1 [file 1 › icmt_a_2026915_sm1077.pdf]

**A**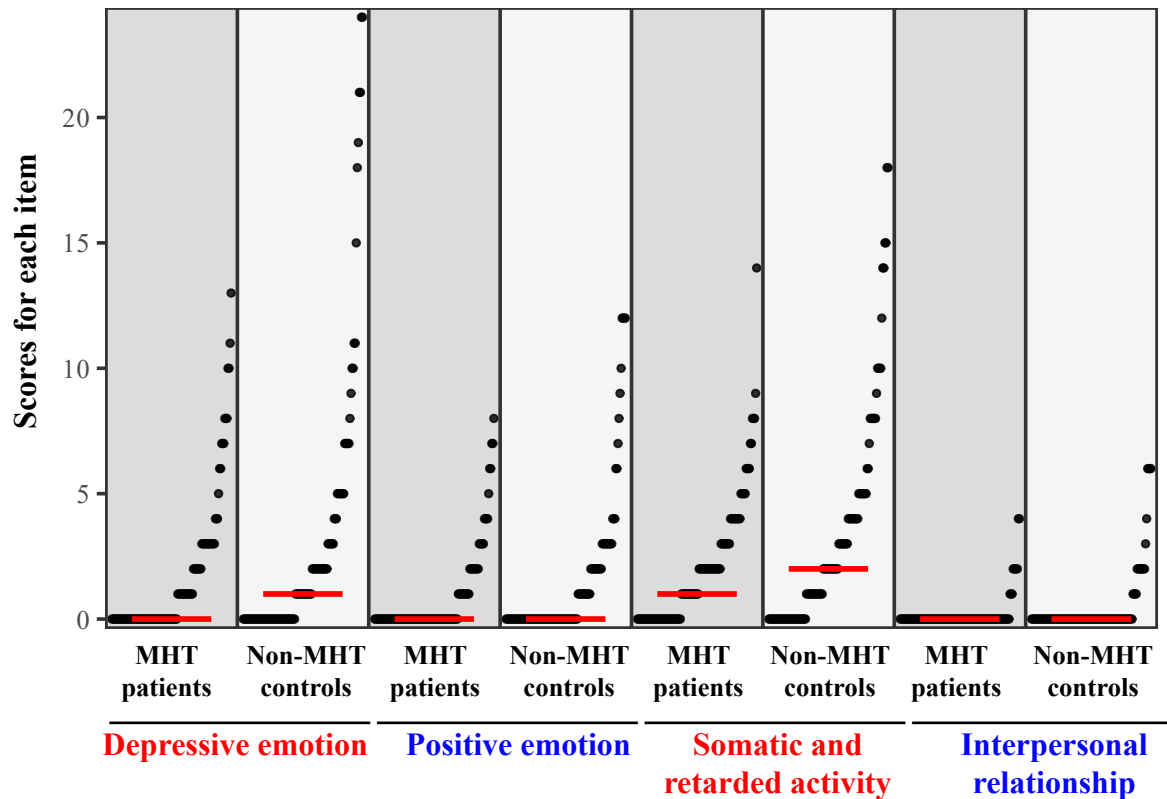

Supplement: Supplementary file 1 [file 1 › icmt_a_2026915_sm1075.pdf]

# Impacts of Menopause Hormone Therapy on Mood Disorders Among Postmenopausal Women

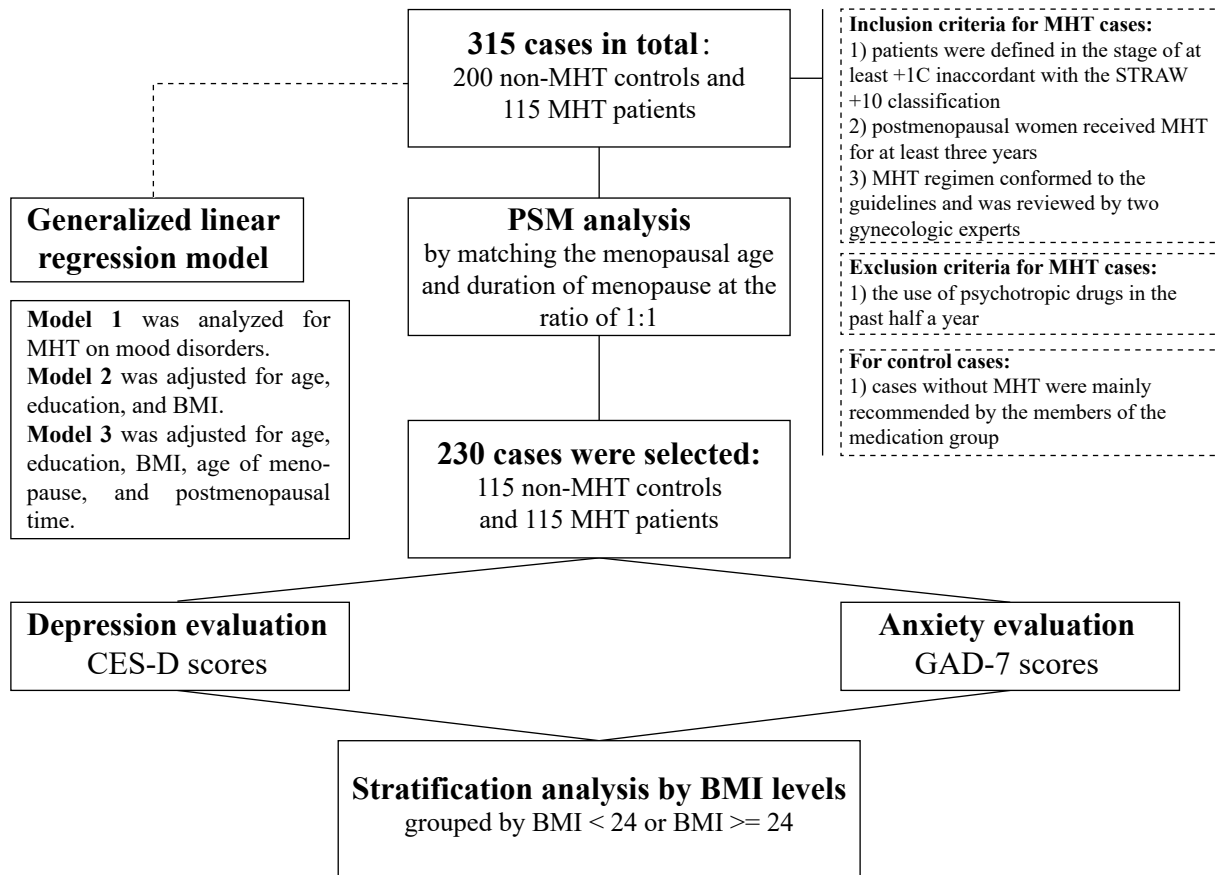

Supplement: Supplementary file 1 [file 1 › icmt_a_2026915_sm1074.pdf]
